# Supplementary material for: Nanostructured Carbon-Doped BN for CO2 Capture Applications
Source: MDPI journal article supplement (doi:10.3390/nano13172389), 2023-08-22
Supplement: s1 [file s1]

# Nanostructured Carbon Doped BN for CO<sub>2</sub> Capture Applications

Rimeh Mighri<sup>1</sup>, Kevin Turani-I-Belloto<sup>2</sup>, Umit B. Demirci<sup>2</sup> and Johan G. Alauzun<sup>1\*</sup>

<sup>1</sup> Institut Charles Gerhardt, Univ Montpellier, CNRS, ENSCM, Montpellier, France

<sup>2</sup> Institut Européen des Membranes, IEM – UMR 5635, Univ Montpellier, ENSCM, CNRS, Montpellier, France

\* johan.alauzun@umontpellier.fr.

Equation S1: Clausius–Clapeyron

$$\Delta H_{ads} = R \left[ \frac{\partial \ln P}{\partial \left( \frac{1}{T} \right)} \right]_q \quad (S1)$$

In this equation,  $[\Delta H]_{ads}$  corresponds to the isosteric adsorption enthalpy (kJ.mol<sup>-1</sup>), R to the ideal gas constant (8.314 J.mol<sup>-1</sup>.K<sup>-1</sup>) and q to the adsorbed quantity of CO<sub>2</sub> at a pressure P and temperature T.

Equation S2: Obtained by solving equation S1

$$\Delta H_{ads} = - \left( \frac{RT_1 T_2}{T_2 - T_1} \ln \frac{P_2}{P_1} \right) \quad (S2)$$

Equation 3: Ideal Adsorption Solution Theory (IAST)

$$S_{CO_2/N_2} = \frac{q_1/q_2}{P_1/P_2} \quad (S3)$$

$q_1$  and  $q_2$  are respectively the adsorbed quantity of CO<sub>2</sub> and N<sub>2</sub> at  $P_1$  and  $P_2$ ,  $P_1 = 0.15$  bar and  $P_2 = 0.75$  bar.

Equation S4: Recyclability calculation of CO<sub>2</sub> uptake after 5 cycles.

$$Recyclability (\%) = \frac{Q_{ads_{cycle\ 5}}}{Q_{ads_{cycle\ 1}}} * 100 \quad (S4)$$

**Table S1.** The synthesis conditions of the BN/C materials prepared from the AB@C16AB nanostructure.

| Material | Varied conditions              | Solvent              | ACN /<br>cyclohexane<br>volume ratio | Polymerization T<br>(°C) | Pyrolysis T<br>(°C) | Heating<br>rate<br>(°C/min) |
|----------|--------------------------------|----------------------|--------------------------------------|--------------------------|---------------------|-----------------------------|
| BN/C-1   | Pyrolysis<br>temperature       | Solvent-free         | -                                    | 90                       | 600                 | 10                          |
| BN/C-2   |                                | Solvent-free         | -                                    | 90                       | 800                 | 10                          |
| BN/C-3   |                                | Solvent-free         | -                                    | 90                       | 1000                | 10                          |
| BN/C-4   |                                | Solvent-free         | -                                    | 90                       | 1100                | 10                          |
| BN/C-5   | Pyrolysis heating<br>rate      | Solvent-free         | -                                    | 90                       | 1100                | 2                           |
| BN/C-6   |                                | Solvent-free         | -                                    | 90                       | 1100                | 5                           |
| BN/C-7   |                                | Solvent-free         | -                                    | 90                       | 1100                | 15                          |
| BN/C-8   | Polymerization<br>with solvent | ACN /<br>cyclohexane | 1/3                                  | 90                       | 1100                | 10                          |

Table S2. Textural properties of the BN/C materials prepared from the AB@C16AB nanostructure.

| Material | BET SSA                          |                   | Pore volume                     |                 |
|----------|----------------------------------|-------------------|---------------------------------|-----------------|
|          | Total SSA<br>(m <sup>2</sup> /g) | t-plot SSA<br>(%) | Total V<br>(cm <sup>3</sup> /g) | t-plot V<br>(%) |
| BN/C-1   | 172                              | 63                | 0.13                            | 50              |
| BN/C-2   | 235                              | 88                | 0.15                            | 61              |
| BN/C-3   | 322                              | 94                | 0.21                            | 66              |
| BN/C-4   | 585                              | 94                | 0.32                            | 67              |
| BN/C-5   | 11                               | -                 | 0.09                            | -               |
| BN/C-6   | 400                              | 87                | 0.33                            | 42              |
| BN/C-7   | 378                              | 82                | 0.30                            | 47              |
| BN/C-8   | 767                              | 98                | 0.32                            | 92              |

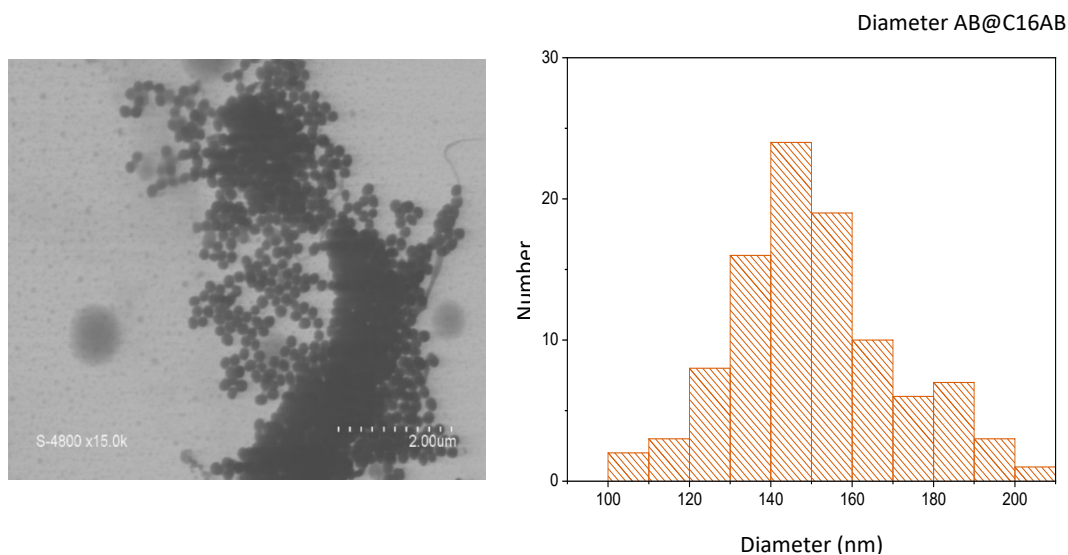

Figure S1. Statistical histogram of AB@C16AB particle size from ImageJ software.

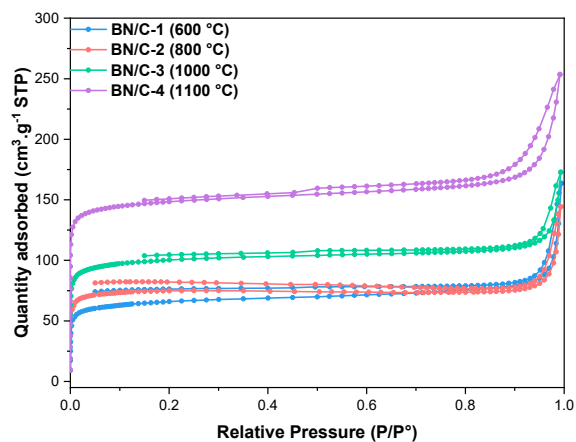

Figure S2. Nitrogen adsorption-desorption isotherms at -196 °C of BN/C-1 to BN/C-4.

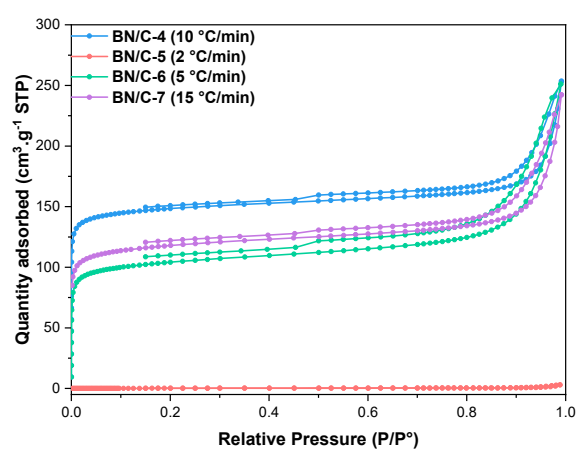

**Figure S3.** Nitrogen adsorption-desorption isotherms at  $-196\text{ }^{\circ}\text{C}$  of BNC-4 to BN/C-7 using an ACN/cyclohexane mixture.
